# Supplementary material for: Transcriptomics and Comparative Analysis of Three Antarctic Notothenioid Fishes
Source: PubMed Central journal article supplement (PMC3420891; doi:10.1371/journal.pone.0043762), 2012-08-16
Supplement: pone.0043762.s005.pdf [file pone.0043762.s005.pdf]

Table S3. Analysis of specie-specifics statistics of metabolic pathway

| mfn_pathway                                                     | Liver |     |     |     | Brain |    |    |    | Zebrafish | Stickleback | Medaka | Takifugu | Tetraodon |
|-----------------------------------------------------------------|-------|-----|-----|-----|-------|----|----|----|-----------|-------------|--------|----------|-----------|
|                                                                 | NC*   | PA* | CA* | DM* | NC    | PA | CA | DM |           |             |        |          |           |
| 1- and 2-Methylnaphthalene degradation                          | 1     | 1   |     |     |       |    |    |    | 3         | 2           | 3      | 3        | 2         |
| 3-Chloroacrylic acid degradation                                | 1     | 1   | 2   | 2   | 1     |    | 3  | 5  | 2         | 1           | 2      | 2        | 1         |
| 3-oxo-10R-octadecatrienoate beta-oxidation                      | 5     | 8   | 3   | 6   | 5     |    |    |    | 4         | 4           | 4      | 4        | 4         |
| Alanine and Aspartate Metabolism                                | 8     | 11  | 9   | 3   | 4     |    | 2  | 7  | 7         | 9           | 7      | 10       | 9         |
| Alkaloid biosynthesis II                                        | 4     | 2   | 3   | 1   |       | 2  | 1  | 1  | 3         | 3           | 2      | 3        | 3         |
| Aminosugars metabolism                                          | 23    | 15  | 11  | 3   | 5     | 2  | 3  | 4  | 19        | 18          | 18     | 19       | 19        |
| Androgen and estrogen biosynthesis and metabolism               | 36    | 31  | 17  | 14  | 12    | 10 | 7  | 12 | 12        | 18          | 19     | 16       | 18        |
| Arachidonic acid metabolism                                     | 24    | 13  | 12  | 12  | 11    | 3  | 8  | 8  | 19        | 19          | 21     | 17       | 19        |
| Arginine and Proline Metabolism                                 | 13    | 12  | 5   | 3   | 2     | 3  | 2  | 2  | 11        | 12          | 11     | 12       | 11        |
| Ascorbate (Vitamin C) and Aldarate Metabolism                   |       |     |     |     |       |    |    |    | 1         | 1           | 1      | 1        | 1         |
| Aspartate and asparagine metabolism                             | 24    | 18  | 16  | 12  | 7     | 3  | 8  | 10 | 26        | 36          | 33     | 39       | 33        |
| Atrazine degradation                                            |       |     |     |     |       |    |    |    | 0         | 0           | 1      | 1        | 1         |
| Benzoate degradation via CoA ligation                           | 4     | 4   | 3   | 3   | 2     | 1  |    |    | 3         | 4           | 3      | 3        | 3         |
| Beta-Alanine metabolism                                         | 7     | 9   | 6   | 1   | 2     | 1  | 4  |    | 6         | 6           | 6      | 6        | 6         |
| Bile acid biosynthesis                                          | 5     | 12  | 6   | 3   | 1     | 1  | 1  | 2  | 14        | 14          | 16     | 16       | 15        |
| Biopterin metabolism                                            | 6     | 3   | 2   | 1   | 5     |    |    | 1  | 5         | 5           | 4      | 4        | 3         |
| Blood Group Biosynthesis                                        | 1     | 3   |     |     |       | 5  | 3  | 1  | 2         | 3           | 2      | 3        | 2         |
| Butanoate metabolism                                            | 2     | 5   | 1   | 2   | 1     | 1  | 2  | 4  | 11        | 11          | 12     | 12       | 11        |
| C21-steroid hormone biosynthesis and metabolism                 |       |     | 1   |     | 1     |    |    |    | 10        | 15          | 16     | 17       | 15        |
| C5-Branched dibasic acid metabolism                             | 1     |     |     |     |       |    |    |    | 2         | 2           | 2      | 1        | 2         |
| Carbon fixation                                                 | 4     | 3   |     | 3   | 2     | 3  | 5  | 5  | 3         | 3           | 3      | 3        | 3         |
| Carnitine shuttle                                               | 3     | 3   | 2   |     |       | 1  |    | 2  | 0         | 1           | 1      | 1        | 1         |
| Chondroitin sulfate degradation                                 | 6     | 1   | 2   |     | 1     |    |    |    | 1         | 2           | 2      | 2        | 3         |
| CoA Catabolism                                                  |       |     |     |     |       |    |    |    | 0         | 0           | 0      | 0        | 0         |
| D4&E4-neuroprostanes formation                                  |       |     |     |     |       |    |    |    | 0         | 0           | 0      | 0        | 0         |
| De novo fatty acid biosynthesis                                 | 7     | 10  | 3   | 1   | 3     | 3  | 1  | 4  | 8         | 11          | 10     | 9        | 9         |
| Dimethyl-branched-chain fatty acid mitochondrial beta-oxidation |       |     |     |     |       |    |    |    | 4         | 4           | 4      | 4        | 4         |
| Di-unsaturated fatty acid beta-oxidation                        | 6     | 13  | 4   |     | 3     | 3  | 5  |    | 6         | 6           | 6      | 6        | 6         |
| Dynorphin metabolism                                            |       |     |     |     |       |    |    |    | 2         | 2           | 2      | 1        | 1         |
| Electron transport chain                                        | 57    | 54  | 43  | 16  | 45    | 31 | 34 | 14 | 5         | 5           | 5      | 5        | 5         |
| Fatty acid activation                                           |       |     |     |     |       |    |    |    | 2         | 2           | 2      | 2        | 2         |
| Fatty Acid Metabolism                                           | 5     | 5   | 2   | 2   |       | 1  | 2  | 1  | 11        | 11          | 11     | 11       | 10        |
| Fatty acid oxidation                                            |       |     |     |     |       |    |    |    | 2         | 2           | 2      | 2        | 2         |
| Fatty acid oxidation, peroxisome                                | 1     | 1   | 1   | 1   |       |    |    |    | 1         | 1           | 1      | 1        | 1         |
| Fructose and mannose metabolism                                 | 13    | 16  | 11  | 4   | 4     | 2  | 4  | 5  | 13        | 13          | 13     | 12       | 13        |
| Galactose metabolism                                            | 4     | 5   | 1   | 2   | 2     | 1  | 2  | 5  | 9         | 10          | 10     | 10       | 10        |
| Geraniol degradation                                            |       |     |     |     |       |    |    |    | 1         | 1           | 1      | 1        | 1         |
| Glutamate metabolism                                            | 2     | 1   |     |     |       |    |    | 1  | 10        | 11          | 11     | 12       | 10        |
| Glutathione Metabolism                                          | 2     |     |     |     | 1     |    |    |    | 3         | 6           | 5      | 6        | 6         |
| Glycerolipid metabolism                                         |       |     |     |     |       |    |    |    | 1         | 1           | 1      | 1        | 1         |
| Glycerophospholipid metabolism                                  | 38    | 28  | 15  | 8   | 6     | 16 | 9  | 11 | 33        | 43          | 42     | 43       | 43        |
| Glycine, serine, alanine and threonine metabolism               | 33    | 32  | 25  | 21  | 13    | 6  | 9  | 22 | 21        | 30          | 29     | 29       | 25        |
| Glycolysis and Gluconeogenesis                                  | 18    | 18  | 10  | 5   | 7     | 3  | 4  | 13 | 28        | 28          | 27     | 28       | 26        |
| Glycosphingolipid biosynthesis - ganglioseries                  | 9     | 11  | 5   | 3   | 2     | 2  | 2  | 4  | 7         | 13          | 14     | 15       | 16        |
| Glycosphingolipid biosynthesis -                                | 1     | 1   | 3   | 1   |       |    | 1  | 4  | 5         | 5           | 5      | 7        | 6         |

globoseries

|                                                           |    |    |    |    |    |    |    |    |    |    |    |    |    |    |
|-----------------------------------------------------------|----|----|----|----|----|----|----|----|----|----|----|----|----|----|
| Glycosphingolipid biosynthesis - lactoseries              |    |    |    |    |    |    |    | 2  | 3  | 3  | 2  | 1  |    |    |
| Glycosphingolipid biosynthesis - neolactoseries           | 1  |    |    | 1  |    |    |    | 4  | 8  | 8  | 7  | 6  |    |    |
| Glycosphingolipid metabolism                              | 9  | 9  | 4  | 5  | 2  | 4  | 3  | 16 | 21 | 21 | 22 | 23 |    |    |
| Glycosylphosphatidylinositol(GPI)-anchor biosynthesis     |    |    |    |    |    |    |    | 1  | 1  | 1  | 1  | 1  |    |    |
| Glyoxylate and Dicarboxylate Metabolism                   |    | 1  |    |    |    |    |    | 2  | 2  | 2  | 2  | 2  |    |    |
| Heparan sulfate biosynthesis                              | 2  | 1  |    |    |    |    |    | 1  | 1  | 1  | 1  | 1  |    |    |
| Heparan sulfate degradation                               | 2  |    |    |    |    | 1  |    | 1  | 3  | 3  | 3  | 4  |    |    |
| Hexose phosphorylation                                    | 2  | 2  | 1  |    | 1  |    | 1  | 3  | 4  | 5  | 4  | 5  |    |    |
| Histidine metabolism                                      | 9  | 10 | 6  | 7  | 3  | 2  |    | 3  | 9  | 10 | 11 | 10 | 11 |    |
| Hyaluronan Metabolism                                     |    |    |    |    |    |    |    | 2  | 3  | 3  | 3  | 3  |    |    |
| Keratan sulfate biosynthesis                              | 1  |    |    | 1  |    | 1  | 1  | 2  | 2  | 1  | 3  | 2  |    |    |
| Keratan sulfate degradation                               | 1  | 2  |    |    |    | 1  |    | 7  | 7  | 7  | 7  | 7  |    |    |
| Leukotriene metabolism                                    | 1  |    |    |    |    |    |    | 15 | 14 | 14 | 14 | 13 |    |    |
| Limonene and pinene degradation                           |    |    |    |    |    |    |    | 4  | 4  | 4  | 4  | 4  |    |    |
| Linoleate metabolism                                      |    | 1  |    |    | 1  |    | 1  | 7  | 8  | 8  | 7  | 7  |    |    |
| Lipoate metabolism                                        | 5  | 5  | 5  | 2  | 3  | 1  |    | 2  | 4  | 3  | 2  | 3  | 2  |    |
| Lysine metabolism                                         | 94 | 79 | 41 | 26 | 25 | 49 | 23 | 30 | 14 | 15 | 14 | 16 | 13 |    |
| Methionine and cysteine metabolism                        | 24 | 25 | 18 | 16 | 7  | 3  | 8  | 15 | 26 | 32 | 31 | 30 | 32 |    |
| Mono-unsaturated fatty acid beta-oxidation                |    |    |    |    |    |    |    |    | 4  | 4  | 4  | 4  | 4  |    |
| N-Glycan biosynthesis                                     | 26 | 16 | 18 | 6  | 11 | 8  | 7  | 11 | 8  | 11 | 11 | 11 | 12 |    |
| N-Glycan Degradation                                      |    | 1  |    |    | 1  |    |    |    | 7  | 7  | 7  | 7  | 7  |    |
| Nitrogen metabolism                                       | 3  | 1  |    | 2  | 1  | 1  | 2  | 1  | 3  | 3  | 3  | 3  | 3  |    |
| Nucleotide Sugar Metabolism                               | 1  |    |    |    |    |    |    |    | 2  | 1  | 2  | 1  | 2  |    |
| O-Glycan biosynthesis                                     | 2  | 1  |    |    |    | 1  | 1  | 1  | 2  | 3  | 3  | 3  | 4  |    |
| Omega-3 fatty acid metabolism                             |    |    |    |    |    |    |    |    | 7  | 7  | 7  | 6  | 7  |    |
| Omega-6 fatty acid metabolism                             | 1  |    |    |    |    |    |    |    | 9  | 9  | 9  | 9  | 9  |    |
| Parathio degradation                                      |    |    |    |    |    |    |    |    | 2  | 1  | 2  | 1  | 1  |    |
| Pentose and Glucuronate Interconversions                  |    | 1  |    |    |    |    |    |    | 1  | 1  | 2  | 1  | 0  |    |
| Pentose phosphate pathway                                 | 8  | 12 | 10 | 2  | 4  | 3  | 3  | 5  | 10 | 13 | 12 | 12 | 13 |    |
| Phosphatidylinositol phosphate metabolism                 | 30 | 11 | 5  | 3  | 3  | 13 | 6  | 12 | 11 | 21 | 22 | 20 | 21 |    |
| Phytanic acid peroxisomal oxidation                       | 1  | 2  | 1  |    |    |    |    |    | 1  | 5  | 5  | 5  | 5  |    |
| Polyunsaturated fatty acid biosynthesis                   | 1  | 2  | 1  |    |    |    |    |    | 4  | 5  | 5  | 4  | 4  |    |
| Porphyrin metabolism                                      | 8  | 2  | 2  | 2  | 2  |    | 2  | 1  | 10 | 9  | 10 | 9  | 10 |    |
| Propanoate metabolism                                     | 2  | 1  |    |    |    | 1  |    |    | 8  | 8  | 8  | 8  | 8  |    |
| Prostaglandin formation from arachidonate                 | 10 | 6  | 5  | 1  | 1  | 4  | 2  | 6  | 8  | 8  | 10 | 8  | 10 |    |
| Prostaglandin formation from dihomo gama-linoleic acid    |    |    |    |    |    |    |    |    | 3  | 2  | 2  | 2  | 3  |    |
| Proteoglycan biosynthesis                                 | 4  | 1  |    | 1  |    |    |    |    | 3  | 4  | 15 | 14 | 15 | 15 |
| Purine metabolism                                         | 70 | 36 | 32 | 27 | 25 | 12 | 20 | 17 | 33 | 41 | 38 | 41 | 42 |    |
| Putative anti-Inflammatory metabolites formation from EPA |    |    |    |    |    |    |    |    | 5  | 6  | 6  | 6  | 5  |    |
| Pyrimidine metabolism                                     | 15 | 14 | 5  | 5  | 4  | 2  | 2  | 5  | 30 | 32 | 31 | 30 | 30 |    |
| Pyruvate Metabolism                                       | 1  | 2  |    |    | 1  |    |    |    | 4  | 5  | 5  | 6  | 5  |    |
| R Group Synthesis                                         |    |    |    |    |    |    |    |    | 0  | 0  | 0  | 0  | 0  |    |
| ROS Detoxification                                        | 2  | 2  | 2  | 2  | 3  | 1  | 2  | 1  | 2  | 2  | 2  | 2  | 2  |    |
| Saturated fatty acids beta-oxidation                      |    | 1  |    |    |    |    |    |    | 9  | 9  | 10 | 10 | 10 |    |
| Selenoamino acid metabolism                               | 1  | 2  | 1  | 1  |    |    |    |    | 1  | 8  | 9  | 9  | 10 |    |
| Sialic acid metabolism                                    |    |    |    |    |    |    |    |    | 12 | 14 | 12 | 15 | 14 |    |
| Sphingolipid metabolism                                   |    |    |    |    |    |    |    |    | 1  | 1  | 1  | 2  | 1  |    |
| Squalene and cholesterol biosynthesis                     | 9  | 14 | 7  | 4  | 6  | 2  | 2  | 4  | 13 | 14 | 14 | 14 | 13 |    |

|                                                     |            |            |            |            |            |            |            |            |            |            |            |            |            |
|-----------------------------------------------------|------------|------------|------------|------------|------------|------------|------------|------------|------------|------------|------------|------------|------------|
| Starch and Sucrose Metabolism                       | 9          | 4          |            | 1          | 1          |            | 1          |            | 5          | 6          | 8          | 8          | 8          |
| TCA cycle                                           | 16         | 15         | 9          | 5          | 7          | 9          | 8          | 9          | 13         | 14         | 15         | 14         | 15         |
| Trihydroxycoprostanoyl-CoA beta-oxidation           |            |            |            |            |            |            |            |            | 4          | 4          | 4          | 4          | 4          |
| Tryptophan metabolism                               | 13         | 13         | 11         | 2          | 6          | 7          | 4          | 2          | 18         | 21         | 22         | 23         | 23         |
| Tyrosine metabolism                                 | 9          | 11         | 8          | 3          | 4          | 1          | 4          | 4          | 31         | 37         | 36         | 35         | 34         |
| Ubiquinone Biosynthesis                             |            |            |            | 1          |            |            |            |            | 1          | 1          | 0          | 1          | 1          |
| Urea cycle/amino group metabolism                   | 8          | 2          | 3          |            | 2          |            | 1          | 2          | 20         | 25         | 24         | 24         | 25         |
| Valine, leucine and isoleucine degradation          | 13         | 14         | 6          | 5          | 7          | 2          | 3          | 6          | 21         | 21         | 22         | 22         | 22         |
| Vitamin A (retinol) metabolism                      | 2          | 5          | 2          | 2          |            | 1          | 1          | 2          | 6          | 6          | 6          | 7          | 6          |
| Vitamin B1 (thiamin) metabolism                     | 13         | 9          | 5          | 6          | 4          | 2          | 2          | 7          | 5          | 6          | 5          | 4          | 4          |
| Vitamin B12 (cyanocobalamin) metabolism             | 1          |            |            |            | 1          |            |            |            | 0          | 1          | 0          | 1          | 1          |
| Vitamin B2 (riboflavin) metabolism                  | 5          | 4          | 5          | 1          | 2          | 2          | 3          | 2          | 3          | 3          | 4          | 3          | 4          |
| Vitamin B3 (nicotinate and nicotinamide) metabolism | 8          | 6          | 2          |            |            | 1          | 1          | 3          | 11         | 9          | 11         | 12         | 11         |
| Vitamin B5 - CoA biosynthesis from pantothenate     | 3          | 3          | 2          | 1          | 1          |            | 1          | 1          | 4          | 3          | 3          | 3          | 3          |
| Vitamin B6 (pyridoxine) metabolism                  | 1          |            |            | 1          |            |            |            | 1          | 2          | 1          | 0          | 1          | 1          |
| Vitamin B9 (folate) metabolism                      | 9          | 7          | 4          | 6          | 3          |            |            |            | 9          | 12         | 12         | 8          | 11         |
| Vitamin D                                           |            |            |            |            |            |            |            |            | 0          | 0          | 0          | 0          | 0          |
| Vitamin D3 (cholecalciferol) metabolism             |            |            |            |            |            |            |            |            | 0          | 1          | 1          | 2          | 1          |
| Vitamin E metabolism                                |            |            |            |            |            |            |            |            | 7          | 6          | 6          | 6          | 6          |
| Vitamin H (biotin) metabolism                       |            |            |            |            |            |            |            |            | 2          | 2          | 1          | 1          | 0          |
| Vitamin K metabolism                                |            |            |            |            |            |            |            |            | 0          | 1          | 0          | 1          | 1          |
| Xenobiotics metabolism                              |            |            |            |            |            |            |            |            | 7          | 6          | 8          | 8          | 6          |
| <b>Total</b>                                        | <b>830</b> | <b>706</b> | <b>445</b> | <b>281</b> | <b>290</b> | <b>240</b> | <b>236</b> | <b>308</b> | <b>850</b> | <b>987</b> | <b>983</b> | <b>991</b> | <b>976</b> |

\* NC, *N. coriiceps*; PA, *P. antarcticum*; CA, *C. aceratus*; DM, *D. mawsoni*.
